1  
2  
3  
4  
5  
6  
7  
8  
9  
10  
11  
12  
13  
14  
15  
16  
17  
18  
19  
20  
21

# Validity of observation tools for patients hospitalized with osteoporotic vertebral fractures

Short title: Validity of observation tools for osteoporotic vertebral fractures

Youhei Yoshimi<sup>1,2¶</sup>, Takanori Matsuura<sup>1,2¶\*</sup>, Kazuaki Miyazato<sup>1,2</sup>, Shiho Takahashi<sup>3&</sup>, Nami Tanaka<sup>3&</sup>, Hanae Morinaga<sup>3&</sup>, Asuka Hayata<sup>4&</sup>, Minami Onishi<sup>4&</sup>, Yousuke Nagano<sup>4&</sup>, Hideo Ohnishi<sup>1,2</sup>

<sup>1</sup>Department of Orthopedics, Moji Medical Center, Kitakyushu, Japan

<sup>2</sup>Department of Orthopedics, School of Medicine, University of Occupational and Environmental Health, Kitakyushu, Japan

<sup>3</sup>Department of Nursing, Moji Medical Center, Kitakyushu, Japan

<sup>4</sup>Department of Rehabilitation, Moji Medical Center, Kitakyushu, Japan

22 \* Corresponding author

23 E-mail: [t\\_matuntun\\_1223@med.uoeh-u.ac.jp](mailto:t_matuntun_1223@med.uoeh-u.ac.jp) (TM)

24

25

26 ¶These authors contributed equally to this work

27 &These authors also contributed equally to this work

28

## 29 **Abstract**

30           Osteoporotic vertebral fractures in older patients impair activities of daily living because of low  
31 back pain and abnormal posture. Assessing pain using self-reported assessment tools is difficult,  
32 especially in patients with moderate-to-severe cognitive impairment. In recent years, observational  
33 assessment tools have been used when self-reported assessment tools were difficult to implement.  
34 However, no reports have investigated the usefulness of observational assessment tools in patients with  
35 acute-phase orthopedic disorders without comorbidities. This study examined the validity of  
36 observational tools for pain assessment in patients with lumbar vertebral fractures. Patients admitted to  
37 our hospital with acute-phase vertebral fractures were enrolled in this prospective study. Pain was  
38 assessed using Japanese versions of the Abbey Pain Scale and Doloplus-2 observational assessment  
39 tools, in addition to the Numerical Rating Scale, a self-reported assessment tool. To verify the validity of  
40 each pain assessment tool, we examined whether each tool correlated with the activities of daily living  
41 and ambulatory status. Activities of daily livings were assessed using the Barthel Index. Ambulatory  
42 status was assessed using the Functional Ambulation Categories and the 10-m walking test. Similar to  
43 the Numerical Rating Scale scores, assessments with the Abbey Pain Scale and Doloplus-2 showed  
44 significant decreases in scores over time. In addition, a significant positive correlation was observed  
45 between the self-reported and observational assessment tools. Each pain assessment tool was  
46 significantly negatively correlated with activities of daily livings and ambulatory status. Our results  
47 indicated when self-reported assessment with the Numerical Rating Scale was difficult for patients with  
48 cognitive impairment, pain could be estimated using the Abbey Pain Scale and Doloplus-2 observational  
49 assessment tools.

50

51

## 52 **Introduction**

53 Osteoporotic vertebral fractures occur in older adults and result in a functional loss in activities  
54 of daily living (ADLs) because of prolonged lower back pain and abnormal posture [1-5]. In Japan,  
55 recent reports have that shown musculoskeletal disorders are one of the main reasons older adults  
56 require nursing care due to falls and resultant fractures [6]. Thus, preventing severe osteoporosis and  
57 low-trauma fractures is also important in terms of health economics [2, 7]. The annual incidence of  
58 vertebral fractures in Japan has been reported to be approximately 1,558 per 100,000 people (females  
59 2,117, males 729; the ratio of women to men was 2.90; Kure City, Hiroshima Prefecture, 2015  
60 population aging rate: 32.9%) [8].

61 Conservative orthotic treatment is the major treatment approach for fresh osteoporotic vertebral  
62 fractures, except for burst fractures [9, 10]. At our hospital, patients who have difficulty receiving  
63 outpatient treatment are hospitalized for treatment aimed primarily at pain control using bracing  
64 medication and rehabilitation to prevent muscle atrophy. The length of hospital stay may be long  
65 depending on the pathological condition, physical activity, and social background of the patient, such as  
66 living alone.

67 A recent meta-analysis have shown that pain cannot fully explain the decrease in quality of life  
68 in patients with osteoporotic fractures [3]. Pain is difficult to assess in cognitively impaired patients with  
69 osteoporotic vertebral fractures, and the validity of pain assessments may be questionable [11-16]. The  
70 International Association for the Study of Pain recommends verbal communication tools such as self-  
71 report assessments for patients with early cognitive memory decline [4]. However, these tools are  
72 difficult to use when assessing patients with advanced dementia [17, 18]. In recent years, the use of  
73 observational assessment tools has been proposed as an alternative approach for patients in instances  
74 where self-reported pain assessment is difficult to perform [19-24]. However, no studies have been

75 reported on the usefulness of observational assessment tools for patients with acute-phase orthopedic  
76 disorders without comorbidities, and it is unknown which observational assessment tool is the most  
77 appropriate to use [25].

78 Moji Ward in Kitakyushu City is one of the leading super-aging districts in Japan. In March  
79 2020, it was estimated that 36.5% of the population was aged 65 years or older (94,355 individuals;  
80 male-female composition: 43,205 males and 51,150 females). Many of these patients who have been  
81 hospitalized experience cognitive decline. Optimizing pain assessment tools for patients with cognitive  
82 decline is an important issue in acute medical care for providing adequate pain relief and rehabilitation  
83 of osteoporotic vertebral fractures [11, 13-15].

84 This study aimed to prospectively evaluate the validity of observational assessment tools. Pain  
85 in patients who were admitted to our hospital with acute-phase vertebral fractures was assessed using the  
86 Japanese version of the Abbey Pain Scale (Abbey-J) [26] and Doloplus-2 [27], which are observational  
87 assessment tools, in addition to administering the Numerical Rating Scale (NRS), a self-reported  
88 assessment tool. The scores of each assessment tool were examined for changes and correlations over  
89 time after admission. Furthermore, to evaluate their validity, we determined whether each pain  
90 assessment tool correlated with ADLs and ambulatory status.

91

92

## 93 **Materials and methods**

### 94 **Participants and ethical approval**

95 Thirty-five patients aged 65 years or older who visited the Moji Medical Center with the chief  
96 complaint of low back pain before subsequently being hospitalized and diagnosed with a vertebral body  
97 fracture between April 2022 and March 2023 were prospectively enrolled. Exclusion criteria included:

98 (1) comorbidities; (2) requirements to stay in bed; or (3) inability to participate in the rehabilitation  
99 programs. All patients received an explanation of the study and provided their written consent to  
100 participate on admission.

101 This study was approved by the ethical review board of the Moji Medical Center (approval no:  
102 02-01) and was conducted in compliance with the Declaration of Helsinki. We disclosed this information  
103 to the subjects and provided them with the opportunity to refuse consent.

104

## 105 **Assessment**

### 106 **Pain assessments using self-reported and observational assessment tools**

107 Nurses assessed the pain of the patients at rest and during movement (during transfer to the  
108 bathroom) over 10 consecutive days from the day of admission using the NRS (a self-reported  
109 assessment tool) and Abbey-J (an observational assessment tool). The NRS is a verbal communication  
110 tool in which patients rate pain on an 11-point scale ranging from 0 (no pain) to 10 (worst pain). For the  
111 Abbey-J, pain is rated on a scale of 0 to 3 points (a maximum total score of 18 points) on six items  
112 reflecting behaviors such as changes during specified movements, vocalizations, and facial expressions.  
113 The pain intensity was graded into 4 grades: no pain (0–2 points), mild pain (3–7 points), moderate pain  
114 (8–13 points), or severe pain (14–18 points).

115 In addition, information on the living conditions of each patient was surveyed, and nurses assessed their  
116 pain twice a week (days 4 and 7) with the Doloplus-2, an observational tool developed for older people  
117 with chronic pain who are unable to complain of pain to others. The pain intensity was scored from 0 to  
118 3, with higher scores indicating more severe pain. The maximum score is 30 points, with a score of 5  
119 points or higher indicating the presence of pain.

120           The assessments were performed by the nurses in charge of the patients on the corresponding  
121 days, and the evaluators were not fixed. In consideration of the variability among evaluators, the mean  
122 scores on days 1–4, 5–7, and 8–10 were calculated for analyses.

123

## 124 **Assessment of ambulatory status and ADLs**

125           On admission, the attending physician checked the patient’s ambulatory status before the injury  
126 through history-taking. After the patients were instructed to wear a corset, the physical therapist also  
127 evaluated the ADLs using the Barthel Index (BI) once a week during the hospital stay, and ambulatory  
128 status using the Functional Ambulation Categories (FAC) and 10-m walking test once a week (days 7,  
129 14, 21, 28, and 35). The BI is an assessment tool for ADLs which is scored out of 100 points on all 10  
130 items, according to the classification of independence, partial assistance, and total dependence. The 10  
131 items include eating, moving, grooming, toileting, bathing, walking (moving), going up/downstairs,  
132 dressing, defecating, and urinating. The FAC, originally used in patients with stroke, is a clinical  
133 assessment index of walking ability based on the amount of assistance. Walking ability was classified  
134 into six categories (score 0: nonfunctional ambulator, score 1: ambulator, dependent on physical  
135 assistance – level I, score 2: ambulator, dependent on physical assistance – level II, score 3: ambulator,  
136 dependent on supervision, score 4: ambulator, independent level surface only, score 5: ambulator,  
137 independent based on the observation of movement.

138

139

## 140 **Evaluation of pain assessment tool scores using the Mini-Mental State Examination** 141 **(MMSE)**

142 The MMSE is a neuropsychological screening test for dementia used to objectively determine  
143 which cognitive function is impaired and to what extent (out of 30 points, a score of  $\leq 23$  points strongly  
144 suggests cognitive decline) [28]. Additionally, MMSE-J is the authorized Japanese translation published  
145 by Nihon Bunka Kagaku sha under the permission of Psychological Assessment Resources, Inc.  
146 Individuals who purchased the MMSE-J Test Forms provided permission to use them as part of the  
147 research. MMSE scores classify the degrees of cognitive decline as normal (score 24–30), mild (score  
148 18–23), or moderate to severe (score 0–17).

149

## 150 **Data analysis**

151 A univariate analysis was performed to compare the groups using repeated analysis of variance  
152 (ANOVA) and one-way ANOVA. Considering multicollinearity, Pearson’s correlation coefficient was  
153 calculated to describe the associations between the evaluation items. A multivariate logistic regression  
154 analysis was performed after analyzing the Pearson’s correlation coefficient.

155

156

## 157 **Results**

### 158 **Participant characteristics**

159 Thirty-five patients (mean age  $84.4 \pm 6.65$  years, range 67–95 years; 31 females) with  
160 osteoporotic vertebral fractures were included. The average height and weight were  $147.3 \pm 9.46$  cm  
161 (123–163 cm) and  $46.3 \pm 9.46$  kg (31.3–76.0 kg), respectively. The site and incidence of each fracture was  
162 Th7 (1 patient), Th8 (2 patients), Th9 (1 patient), Th10 (2 patients), Th11 (2 patients), Th12 (12  
163 patients), L1 (6 patients), L2 (7 patients), L3 (3 patients), L5 (1) (Table 1).



164 **Table 1. Patient characteristics.**

|                                                   |                                                                                                                    |
|---------------------------------------------------|--------------------------------------------------------------------------------------------------------------------|
| Age                                               | 84.4 ±6.65                                                                                                         |
| Sex; male : female                                | 4(11.4%): 31 (88.6%)                                                                                               |
| Height (cm)                                       | 147.3 ±7.97                                                                                                        |
| Weight (kg)                                       | 46.3 ±9.46                                                                                                         |
| Body mass index                                   | 21.3 ±4.02                                                                                                         |
| Fracture (number)<br>(multiple fracture included) | Th7 ( 1 ), Th8 ( 2 ), Th9 ( 1 ), Th10 ( 2 ),<br>Th11 ( 2 ), Th12 ( 12 ), L1 ( 6 ), L2 ( 7 ),<br>L3 ( 3 ), L5 ( 1 ) |

165

166

## 167 **Changes in the scores on each pain assessment tool over time**

168 The NRS, Abbey-J, and Doloplus-2 scores decreased significantly over time after admission  
169 (repeated-measures ANOVA followed by the Bonferroni test; NRS at rest):  $F_{7, 140} = 9.5035$ ,  $p =$   
170  $0.000000001263$ ; at 0.5 week vs. at 1.0 weeks:  $p = 0.0409$ , vs. at 1.5 weeks:  $p = 0.0021$ , vs. at 2.0  
171 weeks:  $p = 0.0032$ , vs. at 2.5 weeks:  $p = 0.0029$ , vs. at 3.0 weeks:  $p = 0.0248$ , vs. at 3.5 weeks:  $p =$   
172  $0.0024$ , vs. at 4.0 weeks:  $p = 0.0029$ ; NRS (during movement):  $F_{7,133} = 22.243$ ,  $p < 0.0001$ ; at 0.5 week  
173 vs. at 1.0 weeks,  $p < 0.0001$ , vs. at 1.5 weeks:  $p < 0.0001$ , vs. at 2.0 weeks:  $p < 0.0001$ , vs. at 2.5 weeks:  
174  $p < 0.0001$ , vs. at 3.0 weeks:  $p < 0.0001$ , vs. at 3.5 weeks:  $p < 0.0001$ , vs. at 4.0 weeks:  $p < 0.0001$ :  
175 Abbey-J (at rest):  $F_{7,133} = 3.012$ ,  $p = 0.005718$ ; at 0.5 week vs. at 1.0 weeks:  $p = 1$ , vs. at 1.5 weeks:  $p$   
176  $= 1$ , vs. at 2.0 weeks:  $p = 1$ , vs. at 2.5 weeks:  $p = 1$ , vs. at 3.0 weeks:  $p = 1$ , vs. at 3.5 weeks:  $p = 1$ , vs. at  
177 4.0 weeks:  $p = 1$ ; Abbey-J (during movement):  $F_{7,133} = 3.9269$ ,  $p = 0.0006321$ ; at 0.5 week vs. at 1.0  
178 weeks:  $p = 0.217$ , vs. at 1.5 weeks:  $p = 1$ , vs. at 2.0 weeks:  $p = 1$ , vs. at 2.5 weeks:  $p = 0.024$ , vs. at 3.0  
179 weeks:  $p = 0.099$ , vs. at 3.5 weeks:  $p = 0.458$ , vs. at 4.0 weeks:  $p = 0.259$ ;

180 Doloplus-2:  $F_{7, 133} = 11.014$ ,  $p < 0.0001$ ; at 0.5 week vs. at 1.0 weeks:  $p = 0.00643$ , vs. at 1.5 weeks:  $p$   
181  $< 0.0001$ , vs. at 2.0 weeks:  $p < 0.0001$ , vs. at 2.5 weeks:  $p = 0.00032$ , vs. at 3.0 weeks:  $p = 0.0046$ , vs. at  
182 3.5 weeks:  $p = 0.0006$ , vs. at 4.0 weeks:  $p = 0.00367$  (Fig 1).

183

184 **Fig 1. Changes in scores for each pain assessment tool in hospitalized patients with vertebral**  
185 **fractures.**

186 (A) Numerical Rating Scale (NRS); (B) Japanese version of Abbey Pain Scale (Abbey-J); (C) Doloplus-  
187 2. \*\* $p$  value  $< 0.01$  and \*\*\* $p$  value  $< 0.01$  are statistically significant.

188

189 Next, we evaluated the rate of change in scores over the course of hospitalization, with pain at  
190 0.5 weeks after admission for each score set to 100%. At 4 weeks post-admission, significant differences  
191 were observed among the three groups in the NRS and Abbey-J scores during exercise and in Doloplus-  
192 2 scores. No significant differences were observed at any other time points (one-way ANOVA at 1.0  
193 week:  $F_{2, 98} = 2.175$ ,  $p = 0.119$ ; at 1.5 weeks:  $F_{2, 98} = 1.145$ ,  $p = 0.322$ ; at 2.0 weeks:  $F_{2, 93} = 0.0405$ ,  
194  $p = 0.322$ ; at 2.5 weeks:  $F_{2, 79} = 0.657$ ,  $p = 0.521$ ; at 3.0 weeks:  $F_{2, 72} = 2.541$ ,  $p = 0.0858$ ; at 3.5  
195 weeks:  $F_{2, 60} = 0.018$ ,  $p = 0.982$  (Fig 2); At 4.0 weeks, NRS:  $2.72619 \pm 2.169252$ ,  $n = 22$ ; Abbey-J:  
196  $0.588235 \pm 0.901923$ ,  $n = 20$ ; Doloplus-2:  $1.705882 \pm 1.611083$ ,  $n = 21$ ; one-way ANOVA followed by  
197 the bonferroni test:  $F_{2, 59} = 6.854$ ,  $p = 0.00211$ ) (Fig 2).

198 Although observational assessment tools may underestimate the pain compared with  
199 assessments made by patients, at 4 weeks post-admission, observational assessment tools and self-  
200 assessment tools did not significantly differ.

201

202 **Fig 2. Changes in scores for each pain assessment tool of hospitalized patients with vertebral**  
 203 **fractures.**

204 The pain score at admission is taken as 100. \*\*p value < 0.01 is statistically significant.

205 NRS, Numerical Rating Scale; Abbey-J, Japanese version of Abbey Pain Scale.

206

207 **Correlation between pain assessment tools**

208 At 2 and 3 weeks post-admission, the NRS score was significantly positively correlated with  
 209 both the Abbey-J and Doloplus-2 scores (Table 2).

210 **Table 2. Correlation of each pain assessment tool with ADLs and ambulatory status (at weeks 2**  
 211 **and 3 of hospitalization)**

| 2 Weeks    | NRS | p value | Abbey-J | p value | Doloplus-2 | p value | BI | p value | FAC | p value |        |           |        |          |        |         |       |              |       |          |
|------------|-----|---------|---------|---------|------------|---------|----|---------|-----|---------|--------|-----------|--------|----------|--------|---------|-------|--------------|-------|----------|
| NRS        |     |         |         |         |            |         |    |         |     |         |        |           |        |          |        |         |       |              |       |          |
| Abbey-J    |     |         |         |         |            |         |    |         |     |         | 0.476  | 0.00512   |        |          |        |         |       |              |       |          |
| Doloplus-2 |     |         |         |         |            |         |    |         |     |         | 0.663  | 0.0000266 | 0.587  | 0.000209 |        |         |       |              |       |          |
| BI         |     |         |         |         |            |         |    |         |     |         | -0.101 | 0.577     | -0.542 | 0.000711 | -0.258 | 0.134   |       |              |       |          |
| FAC        |     |         |         |         |            |         |    |         |     |         | -0.127 | 0.489     | -0.406 | 0.0173   | -0.299 | 0.856   | 0.796 | 0.0000000178 |       |          |
| Speed      |     |         |         |         |            |         |    |         |     |         | -0.461 | 0.0179    | -0.372 | 0.0561   | -0.537 | 0.00386 | 0.576 | 0.00166      | 0.608 | 0.000765 |
|            |     |         |         |         |            |         |    |         |     |         |        |           |        |          |        |         |       |              |       |          |
| 3 Weeks    | NRS | p value | Abbey-J | p value | Doloplus-2 | p value | BI | p value | FAC | p value |        |           |        |          |        |         |       |              |       |          |
| NRS        |     |         |         |         |            |         |    |         |     |         |        |           |        |          |        |         |       |              |       |          |
| Abbey-J    |     |         |         |         |            |         |    |         |     |         | 0.608  | 0.00127   |        |          |        |         |       |              |       |          |
| Doloplus-2 |     |         |         |         |            |         |    |         |     |         | 0.484  | 0.0193    | 0.585  | 0.00213  |        |         |       |              |       |          |
| BI         |     |         |         |         |            |         |    |         |     |         | -0.272 | 0.179     | -0.44  | 0.0277   | -0.443 | 0.0343  |       |              |       |          |
| FAC        |     |         |         |         |            |         |    |         |     |         | -0.244 | 0.241     | -0.359 | 0.0777   | -0.371 | 0.0812  | 0.816 | 0.000000382  |       |          |
| Speed      |     |         |         |         |            |         |    |         |     |         | -0.245 | 0.272     | -0.386 | 0.0737   | -0.585 | 0.00567 | 0.653 | 0.000976     | 0.605 | 0.00366  |

212 Red letter: p value < 0.01 is statistically significant. BI, Barthel Index; FAC, Functional Ambulation  
 213 Categories; NRS, Numerical Rating Scale.

214

215

## 216 **Changes in ADLs and ambulatory status over time**

217 Ambulatory status evaluated using the FAC significantly improved over time after admission.  
218 ADLs evaluated using the BI and 10-m walking tests were not significantly different; however, there  
219 was an increasing trend (repeated-measures ANOVA followed by the bonferroni test; BI:  $F_{3,15} =$   
220  $1.7476$ ,  $p = 0.200282$ ; at 1 weeks vs. at 2 weeks:  $p = 1$ , vs. at 3 weeks:  $p = 1$ , vs. at 4 weeks:  $p = 0.905$ ;  
221 the FAC:  $F_{4,16} = 7.5909$ ,  $p = 0.001255$ ; at 0 weeks vs. at 1 weeks:  $p = 0.00024$ , vs. at 2 weeks:  $p =$   
222  $0.00122$ , vs. at 3 weeks:  $p = 0.00132$ , vs. at 4 weeks:  $p = 0.05276$ ; 10-m walking test:  $F_{3,3} = 10.414$ ,  $p =$   
223  $0.04285$ ; at 1 week vs. at 2 weeks:  $p = 1$ , vs. at 3 weeks:  $p = 0.072$ , vs. at 4 weeks:  $p = 0.46$ ) (Fig 3).

224

225 **Fig 3. Changes in scores for ADLs and ambulatory status in hospitalized patients with vertebral**  
226 **fractures.**

227 (A) Barthel Index (BI); (B) Functional Ambulation Categories (FAC); (C) 10-m walking test.

228

229

## 230 **Correlation between ADLs and ambulatory status**

231 At 2 and 3 weeks post-admission, the BI was significantly positively correlated with both the  
232 FAC and 10-m walking test, which are assessment tools for ambulatory ability (Table 2).

233

234 **Correlation of each pain assessment tool with ADLs and ambulatory**  
235 **status**

236 At 2 and 3 weeks post-admission, each pain assessment tool showed a relatively negative  
237 correlation with the assessment tools for ambulatory status and ADLs (Table 2).

238

239

## 240 **Evaluation of scores assigned to items in each pain assessment tool**

### 241 **according to MMSE scores**

242 Each pain assessment tool was used to evaluate the pain of patients with vertebral fractures  
243 according to their degree of cognitive impairment. Of the six patients with an MMSE score of 17 or  
244 lower, two were able to assess their pain using the NRS. Pain was difficult to assess in many patients,  
245 indicating that the NRS is insufficient for pain assessment. The scores on the observational assessment  
246 tools were not significantly different between patients with an MMSE score of 17 or lower and those  
247 with an MMSE score of 18 or higher, and the scores significantly decreased within 3 weeks. However,  
248 only the Abbey-J assessment at 4 weeks showed a significant difference among the three MMSE groups  
249 (one-way ANOVA followed by the bonferroni test: Abbey-J (during movement) at 1 week:  $F_{2, 32} =$   
250  $0.912$ ,  $p = 0.412$ ; at 2 weeks:  $F_{2, 32} = 0.78$ ,  $p = 0.467$ ; at 3 weeks:  $F_{2, 25} = 1.49$ ,  $p = 0.245$ ; at 4 weeks:  
251  $F_{2, 19} = 7.088$ ,  $p = 0.00502$ , MMSE 17 - 0 vs. MMSE 23 - 18:  $p = 1$ , vs. MMSE 30 - 24:  $p = 0.024$ ,  
252 MMSE 30–24 vs. MMSE 23 - 18:  $p = 0.02$ ) (Fig 4).

253

254 **Fig 4. Pain assessment tool score changes for hospitalized patients with vertebral fractures per**  
255 **cognitive impairment degree.**

256 (A) Numerical Rating Scale (NRS); (B) Japanese version of Abbey Pain Scale (Abbey-J), (C) Doloplus-

257 2. \*\* $p$  value  $< 0.01$  is statistically significant. MMSE, Mini-Mental State Examination.

258

259

## 260 **Discussion**

261 In this study, all NRS (a self-reported assessment tool), Abbey-J, and Doloplus-2 (observational  
262 assessment tools) scores decreased significantly over time after admission. The NRS score positively  
263 correlated with both the Abbey-J and Doloplus-2 scores. In addition, each pain assessment tool  
264 negatively correlated with ADLs and ambulatory status. Therefore, this study verified that observational  
265 assessment tools were valid for assessing pain in patients with acute-phase vertebral fractures. However,  
266 the Abbey-J score showed a significant difference only at 2.5 weeks post-admission. Since the Abbey-J  
267 is a relatively simple observational assessment tool, it may not be possible to adequately evaluate the  
268 transition from acute to chronic pain. Additionally, at 4 weeks post-admission, significant differences  
269 were observed among the three MMSE groups (normal, mild, and moderate or severe) in the NRS and  
270 Abbey-J scores during exercise, and in Doloplus-2 scores. Since observational assessment tools are  
271 objective, it is possible that patient pain was underestimated.

272 The NRS is an extremely simple self-reported pain assessment tool that is widely used in  
273 clinical settings and does not require writing instruments. The NRS can be used in patients with mild  
274 cognitive impairment, as defined by an MMSE score of 18 points or higher. However, for patients with  
275 an MMSE scores of 17 points or lower, NRS scores are reportedly difficult to record [12]. In contrast,  
276 the Abbey-J was developed as an observational tool to assess the pain intensity in individuals with  
277 dementia, and its use is also relatively simple [29]. In this study, the Abbey-J scores for low back pain  
278 associated with vertebral fractures were relatively low. One of the characteristics of this study was that  
279 pain was classified as mild in several patients. In addition, the pain scores on Doloplus-2 tended to  
280 decrease within a short period after admission. Pain scores evaluated with observational assessment

281 tools may deviate from the actual severity of clinical symptoms (such as low back pain). However, the  
282 knowledge that pain decreases over time may be sufficient for pain assessment.

283         Of the patients examined with vertebral fractures, the self-reported assessment tool positively  
284 correlated with observational assessment tools. Considering that this study included older patients and  
285 those with cognitive impairment, our results demonstrated that the Abbey-J and Doloplus-2 were  
286 equivalent to the widely used NRS in the current clinical setting. These observational assessment tools  
287 may also be suitable to estimate the pain intensity associated with acute-phase orthopedic disorders that  
288 are common in older patients.

289         Furthermore, the results showing a positive correlation between BI and FAC in study weeks 2  
290 and 3 indicated that ADLs can be determined by evaluating the ambulatory status in older patients with  
291 vertebral fractures, including those with cognitive impairment. In addition, the negative correlation of  
292 each pain assessment tool with ADLs and ambulatory status suggests that the observation of both  
293 ambulatory status and ADLs can contribute to pain assessment. Although the degree of correlation  
294 differed somewhat between the self-reported and observational assessment tools in this study,  
295 observational assessment tools may be used in the future, even for patients who have difficulty using the  
296 NRS to assess their pain. Since a self-reported pain assessment tool such as the NRS is a subjective  
297 approach, it is affected by different pain thresholds among individuals. Poor objectivity is one of the  
298 limitations of self-reported assessment tools. Thus, pain cannot be objectively assessed in patients for  
299 whom self-evaluation of pain is difficult, such as those with cognitive impairment. In this context,  
300 assessor objective approaches to scoring pain based on patient behavior appear to be easy to perform  
301 because the evaluation criteria had been determined [30, 31].

302         When the scores for each pain assessment tool were compared of patients with vertebral  
303 fractures according to the degree of cognitive impairment, pain tended to be assessed as more severe

304 with the Abbey-J and Doloplus-2 than with the NSR in patients with cognitive impairment. It is difficult  
305 to determine which tool is superior or inferior based solely on these results. However, patients with  
306 cognitive impairment may not be able to understand, recognize, or express pain. Thus, their expression  
307 of pain may deviate from their behavior [32, 33]. The validity of the observational assessment tools  
308 demonstrated in this study may have implications in clinical settings because pain intensity can be  
309 determined based on behavior [34, 35]. The Abbey and Doloplus-2 have been reported to be appropriate  
310 for pain assessment in patients with moderate-to-severe dementia [29, 36]. However, evaluators may  
311 need to be proficient in observing patient conditions to assess nonverbal communication, such as facial  
312 expressions and behaviors, in greater detail [37]. Thus, the fact that there was a significant difference  
313 between the Abbey-J scores in patients with an MMSE score of  $\leq 17$  points and in patients with an  
314 MMSE score of  $\geq 18$  points at 4 weeks may suggest the need for proficient observational skills to be  
315 employed when assessing pain.

316

317

## 318 **Limitations**

319 Observational assessment tools may underestimate pain in patients with mild-to-moderate pain  
320 and the scoring is prone to inter-evaluator differences. In observational assessments, pain other than low  
321 back pain may also be simultaneously and inadvertently assessed. Therefore, caution should be  
322 exercised when interpreting the results. In particular, it is necessary to monitor patients for the onset of  
323 comorbidities after admission as factors other than low back pain may substantially change the scores of  
324 the observational assessment tools.

325

326

## 327 **Conclusions**



328           The self-reported NRS scores of patients who received conservative therapy for acute vertebral  
329 fractures at our hospital were significantly positively correlated with observational assessments using the  
330 Abbey-J or Dolopius-2. All pain assessment tools were significantly negatively correlated with ADLs  
331 and ambulatory status. The results of this study suggest that observational assessments using the Abbey-  
332 J or Dolopius-2 could be used to estimate pain, even in patients with cognitive impairment where self-  
333 reported assessments with the NRS are difficult to perform.

334

335

## 336 **Acknowledgments**

337           We thank the medical staff of Moji Medical Center, Kitakyushu, Japan, for their assistance. We  
338 would like to thank Editage for English language editing.

339

340

## 341 **References**

- 342           1. Al-Sari UA, Tobias J, Clark E. Health-related quality of life in older people with osteoporotic  
343 vertebral fractures: a systematic review and meta-analysis. *Osteoporos Int.* 2016;27: 2891-2900.  
344 doi: 10.1007/s00198-016-3648-x.
- 345           2. Fujiwara S, Zhao X, Teoh C, Jaffe DH, Taguchi Y. Disease burden of fractures among patients  
346 with osteoporosis in Japan: health-related quality of life, work productivity and activity  
347 impairment, healthcare resource utilization, and economic costs. *J Bone Miner Metab.* 2019;37:  
348 307-318. doi: 10.1007/s00774-018-0916-1.
- 349           3. Hallberg I, Rosenqvist AM, Kartous L, Lofman O, Wahlstrom O, Toss G. Health-related quality  
350 of life after osteoporotic fractures. *Osteoporos Int.* 2004;15: 834-841. doi: 10.1007/s00198-004-  
351 1622-5.

- 352 4. Lyles KW, Gold DT, Shipp KM, Pieper CF, Martinez S, Mulhausen PL. Association of  
353 osteoporotic vertebral compression fractures with impaired functional status. *Am J Med.*  
354 1993;94: 595-601. doi: 10.1016/0002-9343(93)90210-g.
- 355 5. Miyakoshi N, Itoi E, Kobayashi M, Kodama H. Impact of postural deformities and spinal  
356 mobility on quality of life in postmenopausal osteoporosis. *Osteoporos Int.* 2003;14: 1007-1012.  
357 doi: 10.1007/s00198-003-1510-4.
- 358 6. Nakamura K. A "super-aged" society and the "locomotive syndrome". *J Orthop Sci.* 2008;13: 1-  
359 2. doi: 10.1007/s00776-007-1202-6.
- 360 7. Kanis JA, Jonsson B. Economic evaluation of interventions for osteoporosis. *Osteoporos Int.*  
361 2002;13: 765-767. doi: 10.1007/s001980200106.
- 362 8. Hamasaki T, Okimoto N, Teramoto H, Shirakawa T, Nakagawa T, Mizuno N, et al. Incidence of  
363 clinical vertebral fractures and hip fractures of the elderly (65 years or over) population-large-  
364 scale data analysis using claim database in Kure City, Hiroshima, Japan. *Arch Osteoporos.*  
365 2020;15: 124. doi: 10.1007/s11657-020-00797-2.
- 366 9. Hofler RC, Jones GA. Bracing for acute and subacute osteoporotic compression fractures: a  
367 systematic review of the literature. *World Neurosurg.* 2020;141: e453-e460. doi:  
368 10.1016/j.wneu.2020.05.199.
- 369 10. Longo UG, Loppini M, Denaro L, Maffulli N, Denaro V. Conservative management of patients  
370 with an osteoporotic vertebral fracture: a review of the literature. *J Bone Joint Surg Br.* 2012;94:  
371 152-157. doi: 10.1302/0301-620X.94B2.26894.
- 372 11. Dang H, Stafseth SK. Documentation for assessing pain in postoperative pain management pre-  
373 and post-intervention. *J Perianesth Nurs.* 2023;38: 88-95. doi: 10.1016/j.jopan.2022.05.079.

- 374 12. Closs SJ, Barr B, Briggs M, Cash K, Seers K. A comparison of five pain assessment scales for  
375 nursing home residents with varying degrees of cognitive impairment. *J Pain Symptom Manage.*  
376 2004;27: 196-205. doi: 10.1016/j.jpainsymman.2003.12.010.
- 377 13. Kim YS, Park JM, Moon YS, Han SH. Assessment of pain in the elderly: a literature review. *Natl*  
378 *Med J India.* 2017;30: 203-207. doi: 10.4103/0970-258X.218673.
- 379 14. Warnky DM, Diebolt JH, Ho BV, Brake AD, French EL, Villwock MR, et al. Investigation of a  
380 Novel Activity-Based Checks (ABC) Functional Pain Scale in the post-operative urologic  
381 surgery patient. *Kans J Med.* 2023;16: 35-40. doi: 10.17161/kjm.vol16.18742..
- 382 15. Tkacheva ON, Runikhina NK, Reshetova AA, Lysenkov SN, Cherdak MA, Mkhitaryan EA, et  
383 al. Cognitive status in older patients with limited mobility as a predictor of negative outcome.  
384 *Acta Biomedica Scientifica.* 2022;7: 203-211. doi: 10.29413/abs.2022-7.6.20.
- 385 16. Fry M, Arendts G, Chenoweth L. Emergency nurses' evaluation of observational pain assessment  
386 tools for older people with cognitive impairment. *J Clin Nurs.* 2017;26: 1281-1290. doi:  
387 10.1111/jocn.13591.
- 388 17. Wynne CF, Ling SM, Rensburg R. Comparison of pain assessment instruments in cognitively  
389 intact and cognitively impaired nursing home residents. *Geriatr Nurs.* 2000;21: 20-23. doi:  
390 10.1067/mgn.2000.105793.
- 391 18. Herr K, Coyne PJ, Ely E, Gelinas C, Manworren RCB. Pain assessment in the patient unable to  
392 self-report: clinical practice recommendations in support of the ASPMN 2019 Position  
393 Statement. *Pain Manag Nurs.* 2019;20: 404-417. doi: 10.1016/j.pmn.2019.07.005.
- 394 19. Lichtner V, Dowding D, Esterhuizen P, Closs SJ, Long AF, Corbett A, et al. Pain assessment for  
395 people with dementia: a systematic review of systematic reviews of pain assessment tools. *BMC*  
396 *Geriatr.* 2014;14: 138. doi: 10.1186/1471-2318-14-138.

- 397 20. Hagstrom S, O'Conner-Von S, Tracy MF. Survey of nurses' use of the Clinically Aligned Pain  
398 Assessment (CAPA) tool. *Pain Manag Nurs.* 2022;23: 568-575. doi: 10.1016/j.pmn.2022.04.002.
- 399 21. Hughes JD, Chivers P, Hoti K. The clinical suitability of an artificial intelligence-enabled pain  
400 assessment tool for use in infants: feasibility and usability evaluation study. *J Med Internet Res.*  
401 2023;25: e41992. doi: 10.2196/41992.
- 402 22. Ngu SS, Tan MP, Subramanian P, Abdul Rahman R, Kamaruzzaman S, Chin AV, et al. Pain  
403 assessment using self-reported, nurse-reported, and observational pain assessment tools among  
404 older individuals with cognitive impairment. *Pain Manag Nurs.* 2015;16: 595-601. doi:  
405 10.1016/j.pmn.2014.12.002.
- 406 23. Lukas A, Niederecker T, Günther I, Mayer B, Nikolaus T. Self- and proxy report for the  
407 assessment of pain in patients with and without cognitive impairment: experiences gained in a  
408 geriatric hospital. *Z Gerontol Geriatr.* 2013;46:214-221. doi: 10.1007/s00391-013-0475-y.
- 409 24. Barzanji A, Zareiyan A, Nezamzadeh M, Mazhari MS. Evaluation of observational and  
410 behavioural pain assessment tools in nonverbal intubated critically adult patients after open -  
411 heart surgery: a systematic review. *Open Access Maced J Med Sci.* 2019;7:446-457. doi:  
412 10.3889/oamjms.2019.103.
- 413 25. Hartrick CT, Kovan JP, Shapiro S. The numeric rating scale for clinical pain measurement: a  
414 ratio measure? *Pain Pract.* 2003;3: 310-316. doi: 10.1111/j.1530-7085.2003.03034.x.
- 415 26. Takai Y, Yamamoto-Mitani N, Chiba Y, Nishikawa Y, Hayashi K, Sugai Y. Abbey Pain Scale:  
416 development and validation of the Japanese version. *Geriatr Gerontol Int.* 2010;10: 145-153. doi:  
417 10.1111/j.1447-0594.2009.00568.x.
- 418 27. Wary B, Doloplus C. [Doloplus-2, a scale for pain measurement]. *Soins Gerontol.* 1999;: 25-27.

- 419 28. Folstein MF, Folstein SE, McHugh PR. "Mini-mental state". A practical method for grading the  
420 cognitive state of patients for the clinician. *J Psychiatr Res.* 1975;12: 189-198. doi:  
421 10.1016/0022-3956(75)90026-6.
- 422 29. Abbey J, Piller N, De Bellis A, Esterman A, Parker D, Giles L, et al. The Abbey pain scale: a 1-  
423 minute numerical indicator for people with end-stage dementia. *Int J Palliat Nurs.* 2004;10: 6-13.  
424 doi: 10.12968/ijpn.2004.10.1.12013.
- 425 30. Vitullo M, Holloway D, Tellson A, Nguyen H, Estimon K, Linthicum J, et al. \*Surgical patients'  
426 and registered nurses' satisfaction and perception of using the Clinically Aligned Pain  
427 Assessment (CAPA(©)) tool for pain assessment. *J Vasc Nurs.* 2020;38: 118-131. doi:  
428 10.1016/j.jvn.2020.07.001.
- 429 31. Krulewitch H, London MR, Skakel VJ, Lundstedt GJ, Thomason H, Brummel-Smith K.  
430 Assessment of pain in cognitively impaired older adults: a comparison of pain assessment tools  
431 and their use by nonprofessional caregivers. *J Am Geriatr Soc.* 2000;48: 1607-1611. doi:  
432 10.1111/j.1532-5415.2000.tb03871.x.
- 433 32. Rooney L. Are the current pain assessment tools used by paramedics in Ireland, suitable for use  
434 with cognitively impaired (dementia) patients? *Irish Journal of Paramedicine.* 2018;3. doi:  
435 10.32378/ijp.v3i2.143.
- 436 33. Atee M, Hoti K, Parsons R, Hughes JD. A novel pain assessment tool incorporating automated  
437 facial analysis: interrater reliability in advanced dementia. *Clin Interv Aging.* 2018;13: 1245-  
438 1258. doi: 10.2147/CIA.S168024.
- 439 34. Gregory J. How can we assess pain in people who have difficulty communicating? A practice  
440 development project identifying a pain assessment tool for acute care. *The International Practice*

441 Development Journal. November 2012;2: 1-22. Available from:

442 [https://www.fons.org/Resources/Documents/Journal/Vol2No2/IDPJ\\_0202\\_06.pdf](https://www.fons.org/Resources/Documents/Journal/Vol2No2/IDPJ_0202_06.pdf)

443 35. Gregory J. Initial testing of a behavioural pain assessment tool within trauma units. Int J Orthop  
444 Trauma Nurs. 2017;24: 3-11. doi: 10.1016/j.ijotn.2016.08.004.

445 36. Ando C, Ito Y, Amemiya S, Tamura K, Kako K, Tsuzura S, et al. Effectiveness of the Japanese  
446 DOLOPLUS-2: a pain assessment scale for patients with moderate-to-severe dementia.

447 Psychogeriatrics. 2016;16: 315-222. doi: 10.1111/psyg.12168.

448 37. Gregory J, Richardson G. The use of pain assessment tools in clinical practice: a pilot survey. J  
449 Pain Relief. 2014;3: 140. doi: 10.4172/2167-0846.1000140.

450

451

## 452 **Supporting information captions**

453 **S1 Table. Patient characteristics.**

454 **S2 Table. Correlation of each pain assessment tool with ADLs and ambulatory status (weeks 2 and**  
455 **3 of hospitalization).** Red letter, p value < 0.01 is statistically significant. ADLs, activities of daily  
456 living.

457 **S1 Fig. Changes in scores for each pain assessment tool in hospitalized patients with vertebral**  
458 **fractures.** (A) Numerical Rating Scale (NRS); (B) Japanese version of Abbey Pain Scale (Abbey-J) (C)  
459 Doloplus-2. \*\*p value < 0.01 and \*\*\*p value < 0.01 is statistically significant.

460 **S2 Fig. Changes in scores for each pain assessment tool in hospitalized patients with vertebral**  
461 **fractures (pain score at admission is taken as 100).** \*\*p value < 0.01 is statistically significant.

462 **S3 Fig. Changes in scores for ADLs and ambulatory status in hospitalized patients with vertebral**  
463 **fractures.** (A) Barthel Index (BI); (B) Functional Ambulation Categories (FAC); (C) 10-m walking test;  
464 ADLs, activities of daily living

465 **S4 Fig. Changes in scores for each pain assessment tool of hospitalized patients with vertebral**  
466 **fractures according to the degree of cognitive impairment.** (A) Numerical Rating Scale (NRS); (B)  
467 Japanese version of Abbey Pain Scale (Abbey-J); (C) Doloplus-2. \*\*p value < 0.01 is statistically  
468 significant.

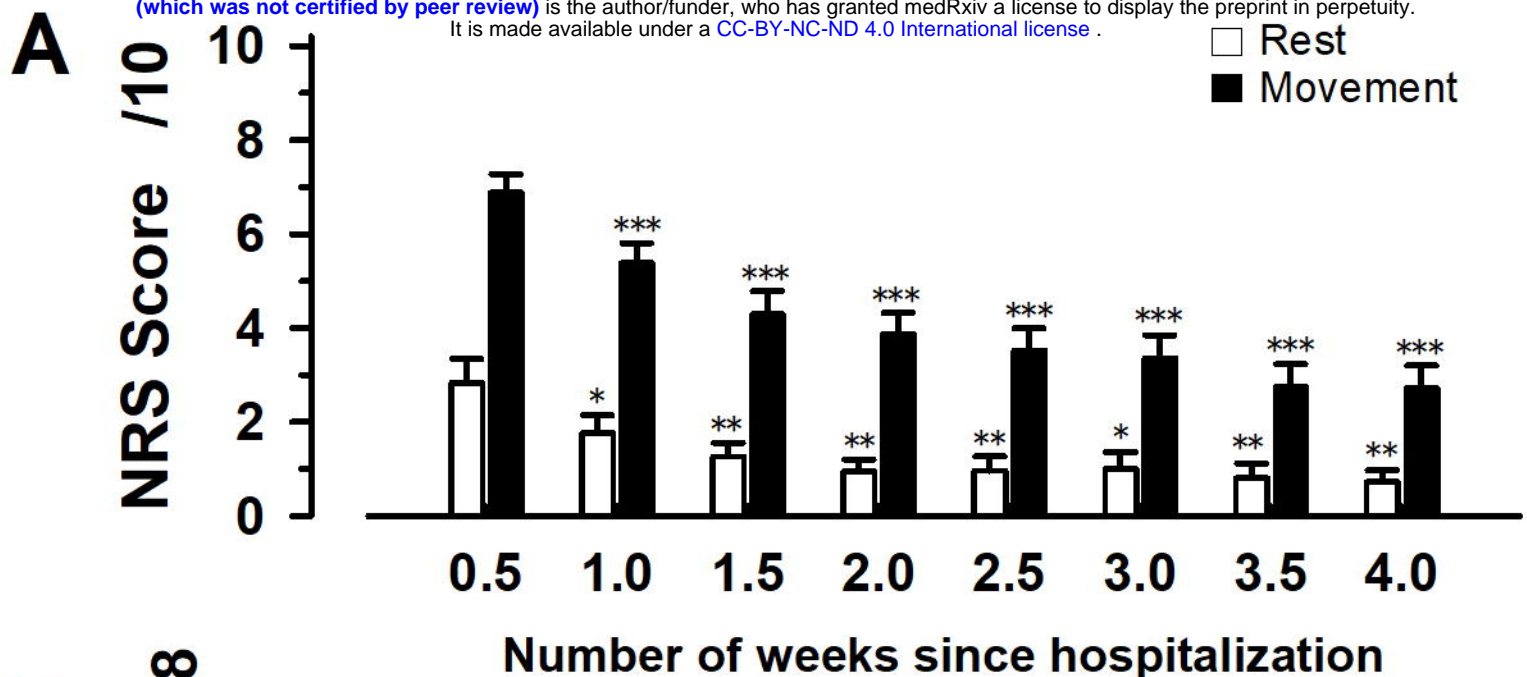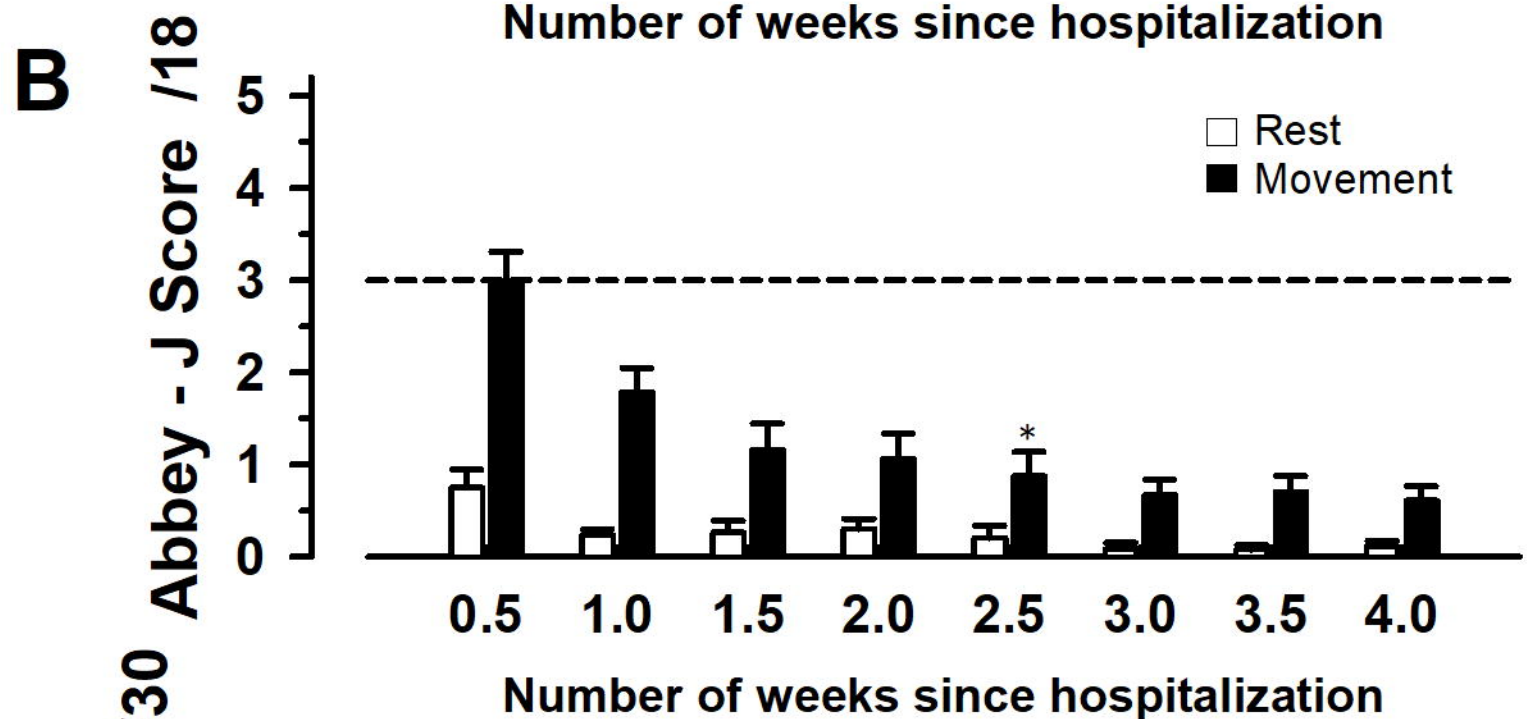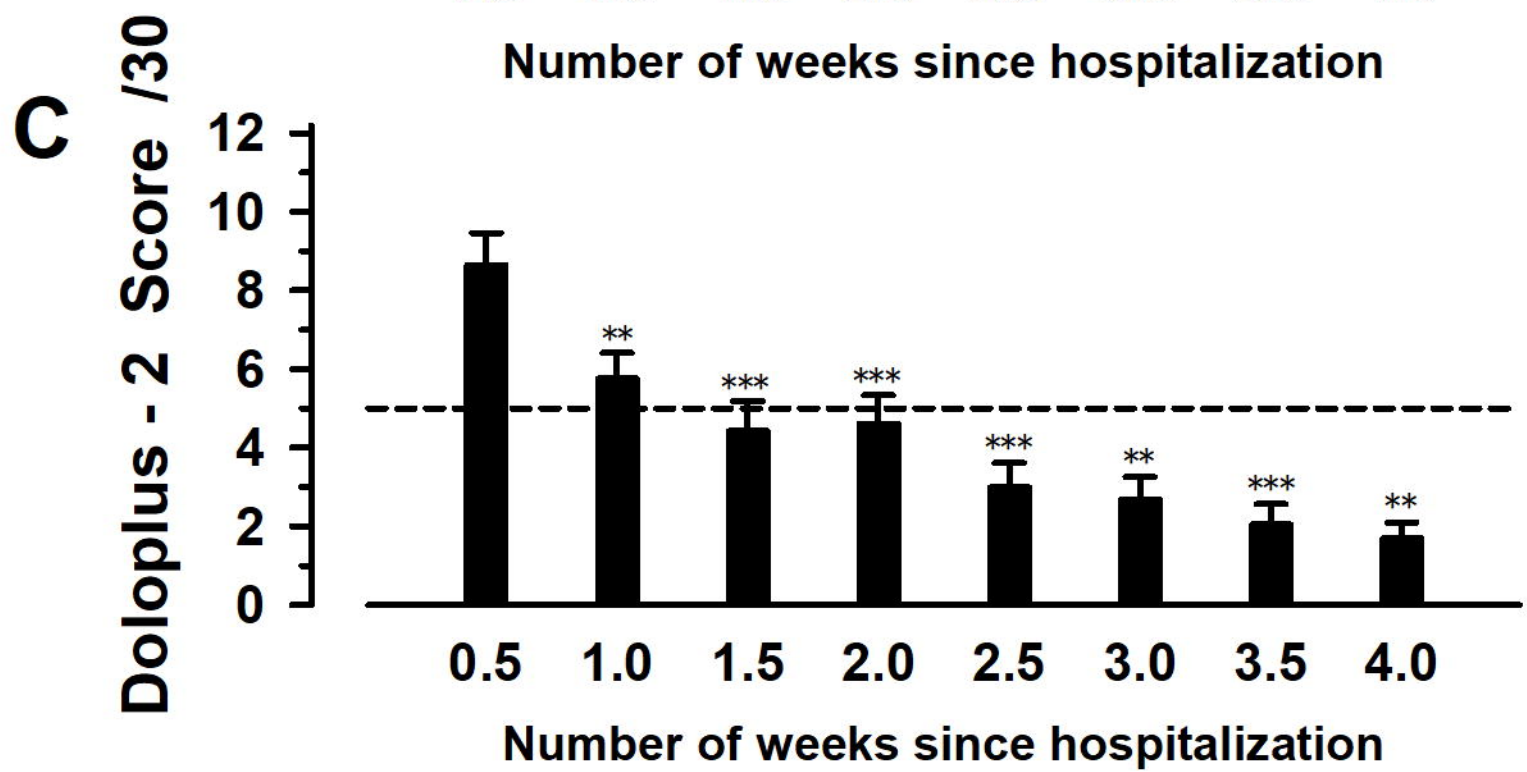



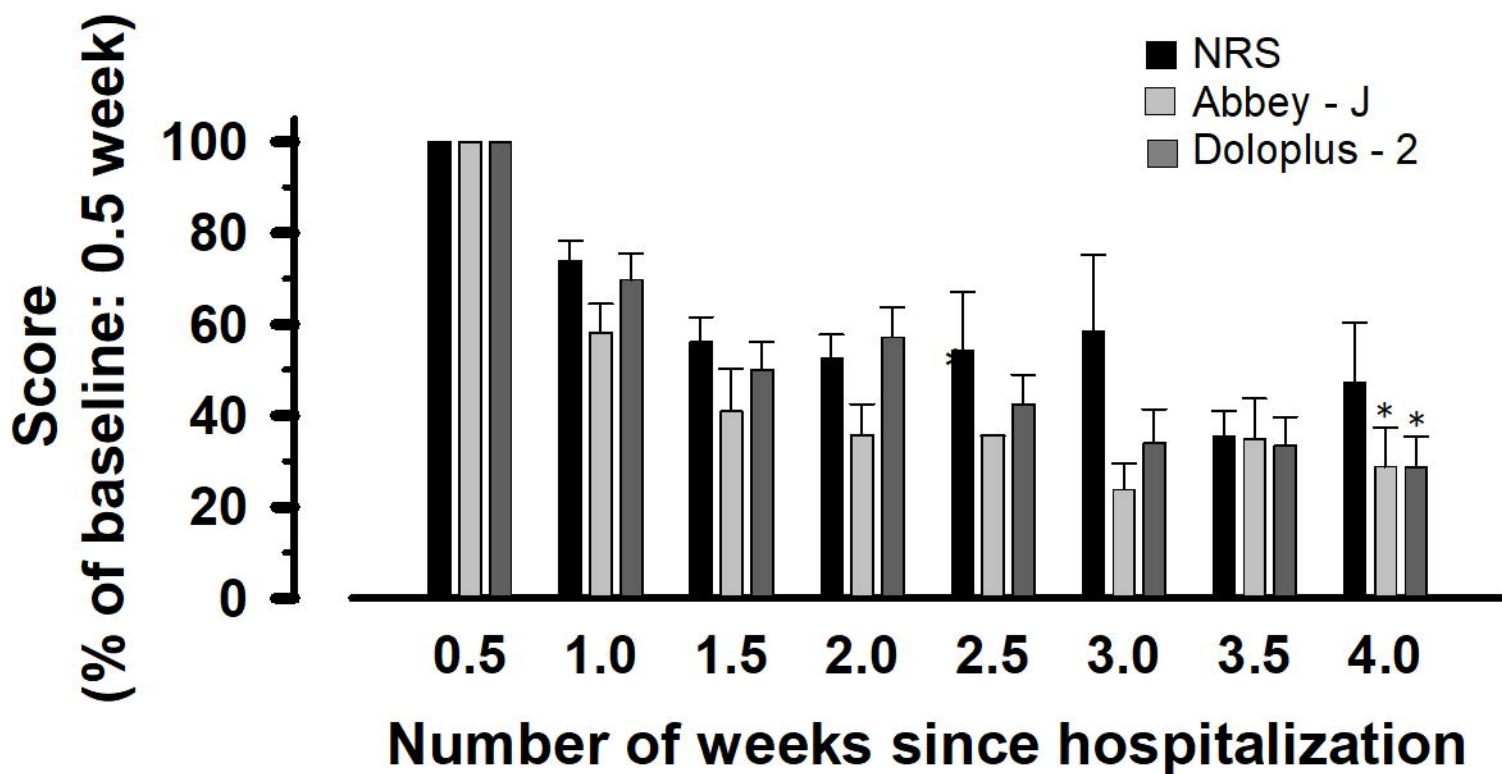

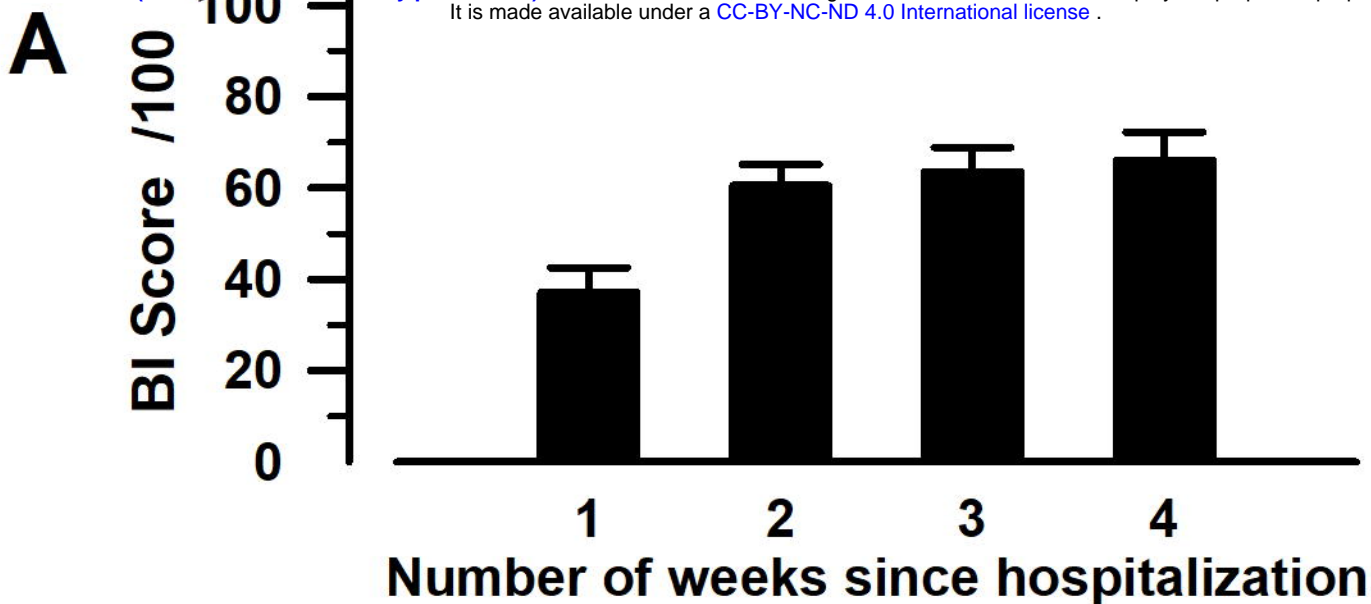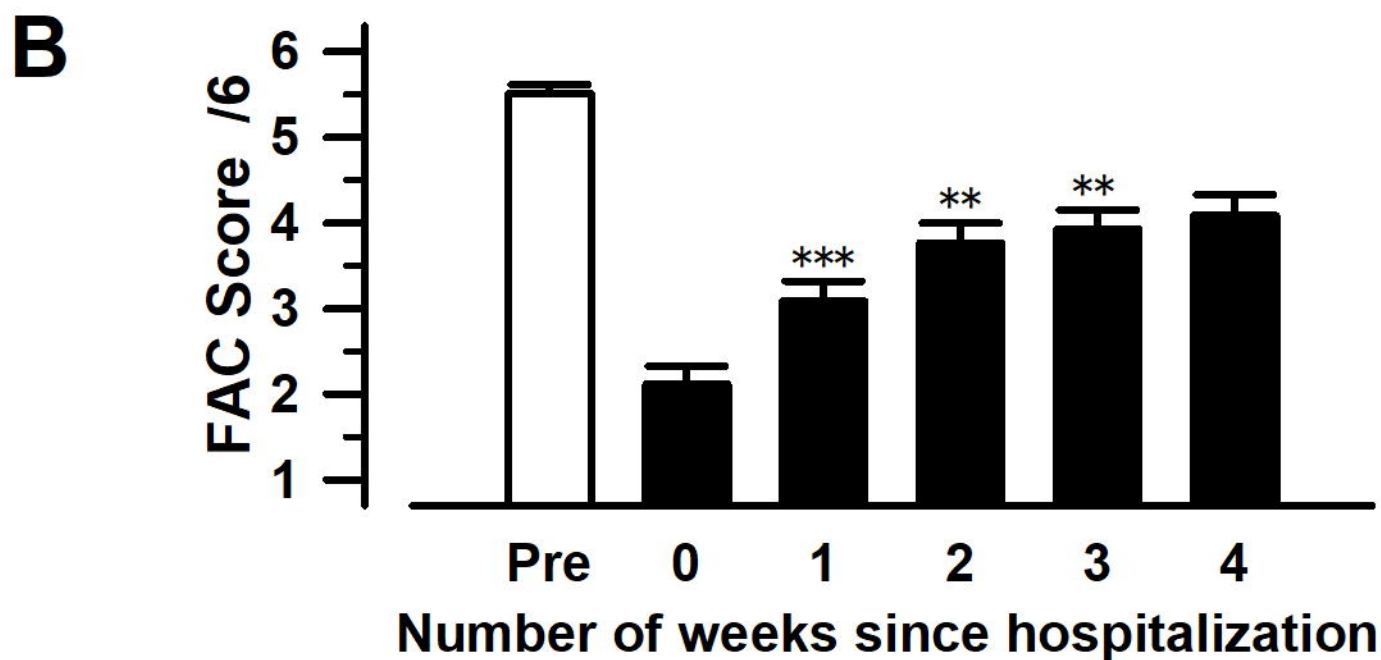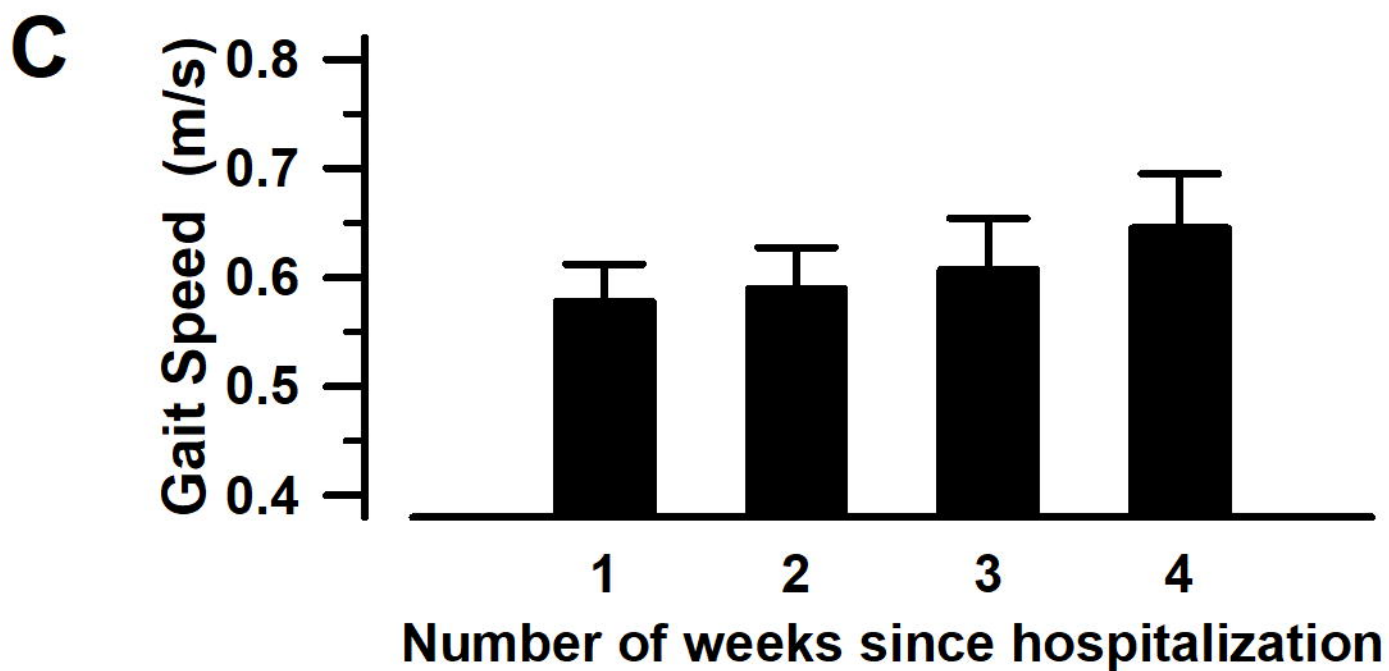

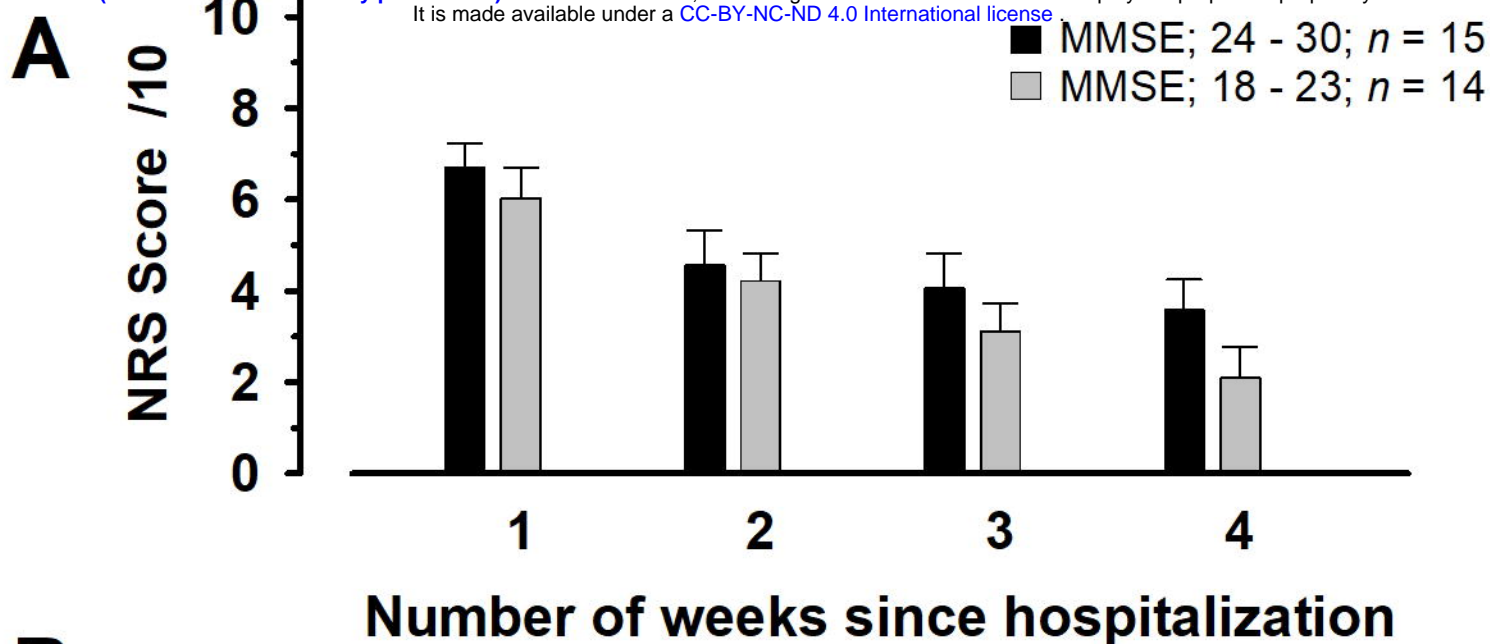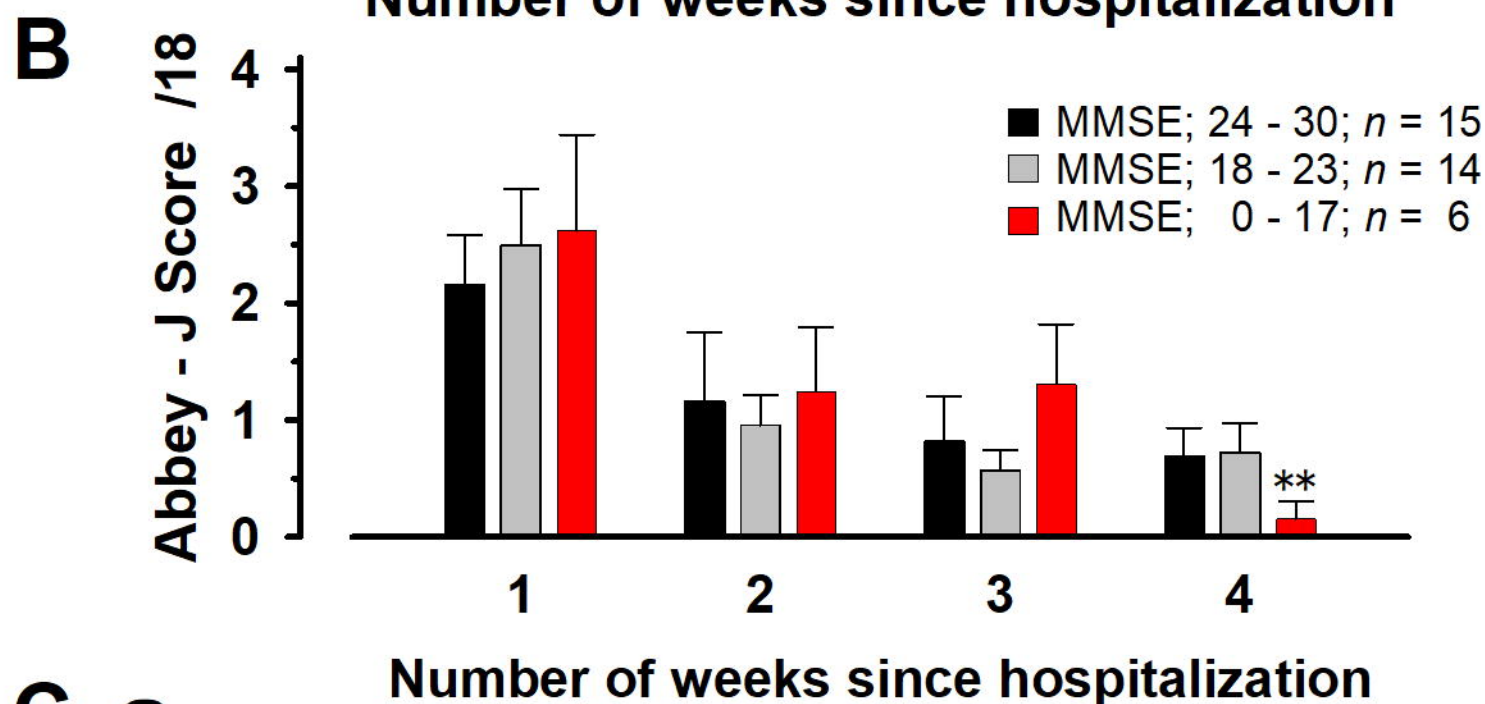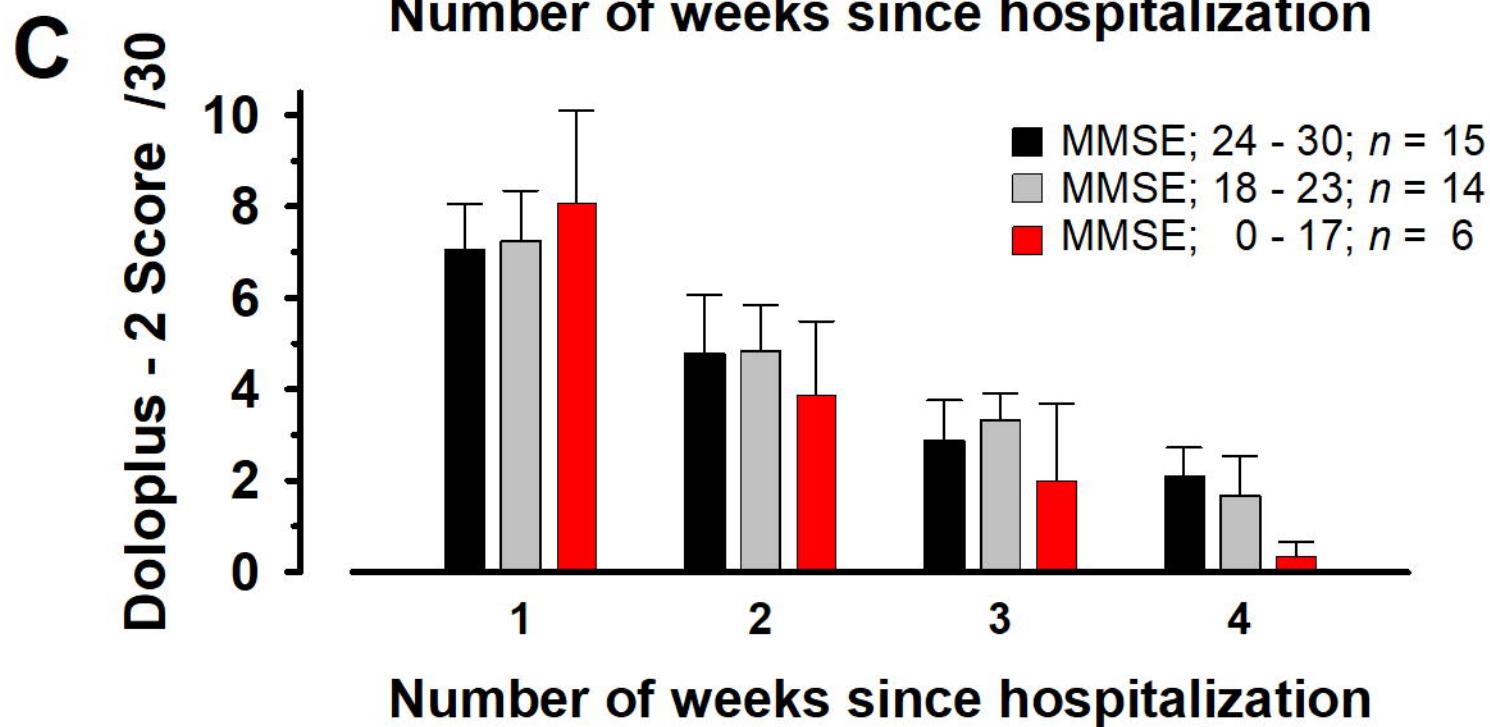

Source: https://medrxiv.org/content/10.1101/2023.06.02.23290859v2.full.pdf
